# Supplementary material for: Evolution of Airway Inflammation in Preschoolers with Asthma—Results of a Two-Year Longitudinal Study
Source: MDPI journal article supplement (doi:10.3390/jcm9010187), 2020-01-09
Supplement: s1 [file s1]

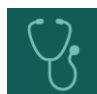

**Table S1.** Disease activity predictors during baseline and 2-year follow-up.

|                            | Baseline                                                                                                                                | Follow-up                                                                                                                                          | Symptomatic Visit                            |
|----------------------------|-----------------------------------------------------------------------------------------------------------------------------------------|----------------------------------------------------------------------------------------------------------------------------------------------------|----------------------------------------------|
| Upper respiratory symptoms | Rhinitis symptoms are present: <4days/week, >4 days/week                                                                                | Rhinitis symptoms last 6 months (yes)                                                                                                              | Runny nose                                   |
|                            | <u>Rhinitis duration</u><br><4 consecutive weeks, >4 consecutive weeks                                                                  | Rhinitis symptoms are present: <4days/week, >4 days/week                                                                                           | Stuffy nose,                                 |
|                            | <u>Are rhinitis Symptoms associated with?</u><br>sleep disturbance (no / yes)<br>school impairment (no / yes)<br>leisure/sport (no/yes) | <u>Rhinitis duration:</u><br><4 consecutive weeks, >4 consecutive weeks                                                                            | Sneezing                                     |
|                            | Visual analogue scale                                                                                                                   | <u>Are rhinitis symptoms associated with?</u><br>sleep disturbance (no / yes)<br>school impairment (no / yes)<br>leisure/sport (no/yes)            |                                              |
|                            | Number of medication courses for rhinitis last 12 months                                                                                | Visual analogue scale<br>Number of medication courses for rhinitis last 12 months                                                                  |                                              |
| Lower respiratory symptoms | Days with symptoms last 3 months: < 1/week, >1week but <1/day, daily                                                                    | Asthma episodes since last evaluation                                                                                                              | Cough during the day/night                   |
|                            | Nights with symptoms last 3 months: ≤2 times/month, >2 times/month, >1/week, almost daily                                               | How many days has the child had coughing, wheezing, shortness of breath, or chest tightness                                                        | Wheezing during the day/night                |
|                            | Cough, wheeze or difficulty in breathing during or after exercise last 12 months (no/yes)                                               | How many days has the child had awakened at night because of symptoms                                                                              | Difficulty in breathing during the day/night |
|                            | Limitation of activities limited by asthma symptoms (no/yes)                                                                            | How many days has the child had awakened in the morning with symptoms that did not improve within 15min of using a short-acting inhaled b2 agonist | Shortness of breath                          |

|                                                                            |                                                                                   |                                                                     |
|----------------------------------------------------------------------------|-----------------------------------------------------------------------------------|---------------------------------------------------------------------|
| Child completely well between symptomatic periods (no/yes)                 | How many days has the child had symptoms while exercising or playing              | Respiratory rate                                                    |
| Number of episodes of wheezing/asthma/cough in the last 3 months           | How many days has your child's asthma caused him/her to miss school               | Wheeze                                                              |
| Number of episodes of wheezing/asthma/cough in the last 12 months          | How many days has your child's asthma caused him/her to reduce his/her activities | Existence/severity of exacerbation:<br>None, mild, moderate, severe |
| Number of hospitalizations for wheezing/asthma/cough in the last 12 months | Has the child had any emergency visit for its asthma                              |                                                                     |
| Inhaled corticosteroids as prophylactic treatment (no/yes/quantity)        | Has the child been hospitalized for its asthma                                    |                                                                     |
|                                                                            | Reliever asthma medication                                                        |                                                                     |
|                                                                            | Daily asthma controller medication                                                |                                                                     |

---
